# Supplementary material
Source: publisher figshare collection journal article supplement (https://tandf.figshare.com/ndownloader/files/20104043)
Supplement: Supplementary file 1 [file 20104043]

**Supplementary File**

Synthesis and antitumor activity of new silver(I)-N-heterocyclic carbene complexes

NESLIHAN ŞAHIN*, SERAP ŞAHIN-BÖLÜKBAŞI and HALIS MARŞAN

| **Content** | **Page** |
| --- | --- |
| Figure S1. 1H and 13C NMR spectrums of **1a** | 2 |
| Figure S2. FT-IR spectrum of **1a** | 3 |
| Figure S3. 1H and 13C NMR spectrums of **1b** | 4 |
| Figure S4. FT-IR spectrum of **1b** | 5 |
| Figure S5. 1H and 13C NMR spectrums of **2a** | 6 |
| Figure S6. FT-IR spectrum of **2a** | 7 |
| Figure S7. 1H and 13C NMR spectrums of **2b** | 8 |
| Figure S8. FT-IR spectrum of **2b** | 9 |
| Figure S9. LC-MS spectrum of **2a** | 10 |
| Figure S10. LC-MS spectrum of **2b** | 11 |

Figure S1. 1H and 13C NMR spectrums of **1a**.

Figure S2. FT-IR spectrum of **1a**.

Figure S3. 1H and 13C NMR spectrums of **1b**.

Figure S4. FT-IR spectrum of **1b**.

Figure S5. 1H and 13C NMR spectrums of **2a**.

Figure S6. FT-IR spectrum of **2a**.

Figure S7. 1H and 13C NMR spectrums of **2b**.

Figure S8. FT-IR spectrum of **2b**.

Figure S9. LC-MS spectrum of **2a**.

Figure S10. LC-MS spectrum of **2b**.
